# Supplementary material for: Bromine and oxygen redox species mediated highly selective electro-epoxidation of styrene
Source: Royal Society of Chemistry journal article supplement (doi:10.1039/d1qo01588e), 2021-12-03
Supplement: d1qo01588e1.pdf [file d1qo01588e1.pdf]

## Supplementary Data

### **Bromine and Oxygen Redox Species Mediated Highly Selective Electro-Epoxidation of Styrene**

*Yuchi Zhang<sup>†</sup>, Asma Iqbal<sup>†</sup>, Jiantao Zai<sup>\*</sup>, Shuyu Zhang, Hongran Guo, Xuejiao Liu, Ibrahim ul  
Islam, Hira Fazal and Xuefeng Qian*

Shanghai Electrochemical Energy Devices Research Center, School of Chemistry and Chemical Engineering and  
State Key Laboratory of Metal Matrix Composites, Shanghai Jiao Tong University Shanghai, 200240, P. R. China.  
E-mail: zaijiantao@sjtu.edu.cn.

<sup>†</sup>These authors contributed equally: Yuchi Zhang, Asma Iqbal.

**Table S1** Some reported electro-epoxidation works.

| Epoxide Type                                                                        | Anode/Cathode, Parameters                                                                                                         |                                                                         |
|-------------------------------------------------------------------------------------|-----------------------------------------------------------------------------------------------------------------------------------|-------------------------------------------------------------------------|
| 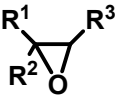   | <p><b>Diamond/Pt, Na<sub>2</sub>CO<sub>3</sub>•H<sub>2</sub>O<sub>2</sub></b><br/>Iminium salt , Constant current: 300 mA</p>     |                                                                         |
|    | <p><b>Ti/Graphite</b>, in situ generated H<sub>2</sub>O<sub>2</sub>, O<sub>2</sub><br/>Constant current: 300 mA, yield: 18.6%</p> |                                                                         |
|    | <p><b>MnO<sub>3</sub>-doped C/Pt</b>,<br/>Constant potential</p>                                                                  |                                                                         |
|    | <p><b>Graphite/Graphite</b>,<br/>NaBr, Constant current, 3 mA cm<sup>-2</sup></p>                                                 |                                                                         |
|   | <p><b>Pt/Pt</b><br/>NaBr, Constant current, 10 mA</p>                                                                             |                                                                         |
|  | <p><b>Pt/Pt NaBr</b><br/>Constant current,<br/>350 mA</p>                                                                         | <p><b>Pt or Ti/Pb</b><br/>Constant current<br/>4 mA cm<sup>-2</sup></p> |
|  | <p><b>C/Fe</b><br/>NaBr, constant current 7 mA</p>                                                                                |                                                                         |

**Table S2** Some by-products entries for electro-epoxidation of different olefins.

| Entry | Substrate                                                                           | Conversion (%) | Selectivity (%) | Diol | dibromide | bromohydrin | substituted           |
|-------|-------------------------------------------------------------------------------------|----------------|-----------------|------|-----------|-------------|-----------------------|
| 1     | 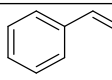   | 100            | 97              | -    | 2         | -           | 1<br>Bromo<br>styrene |
| 2     |    | 100            | 20              | 4    | 6         | 35          | 35                    |
| 3     |    | 100            | 50              | -    | -         | 22          | 28<br>(radical)       |
| 4     |    | 80             | 44              | 12   | 24        | -           | -                     |
| 5     |   | 100            | 70              | -    | -         | -           | 30<br>Aldehyde        |
| 6     |  | 96             | 92              | -    | -         | 4           | -                     |
| 7     |  | 40%            | 99              | -    | -         | 1           | -                     |
| 8     |  | 100%           | 50              | -    | 50        | -           | -                     |
| 9     |  | 100%           | 0%              | -    | 54        | 38          | 8<br>Cyclohexenol     |

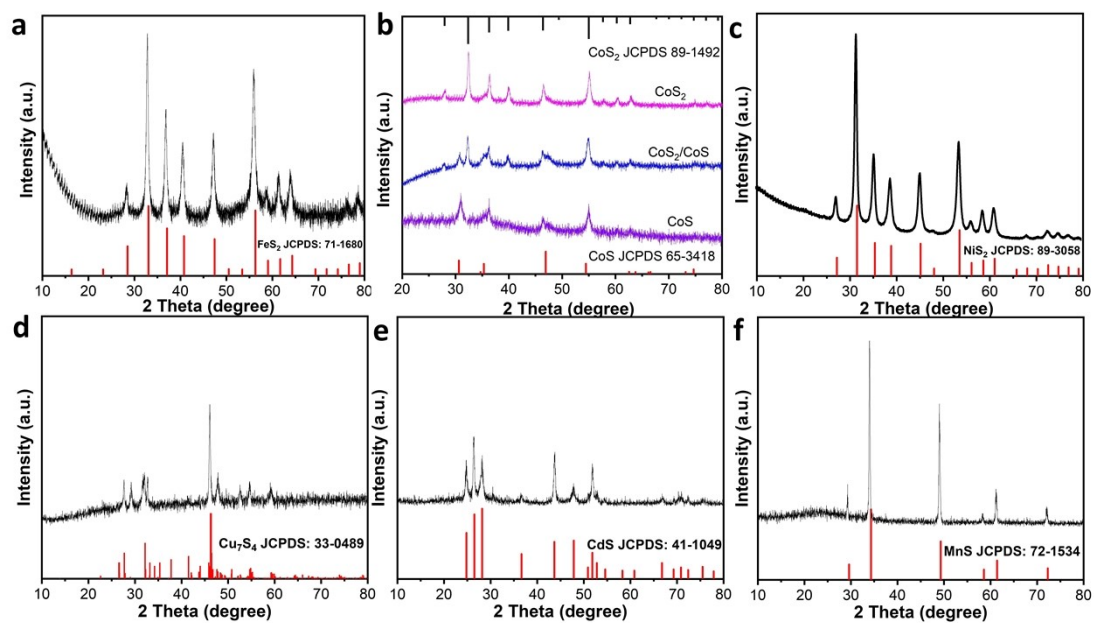

**Fig S1** XRD patterns of prepared metal sulfides and their standard patterns (a) FeS<sub>2</sub>, (b) CoS<sub>2</sub>, CoS and CoS<sub>2</sub>/CoS, (c) NiS<sub>2</sub>, (d) Cu<sub>7</sub>S<sub>4</sub>, (e) CdS, (f) MnS.

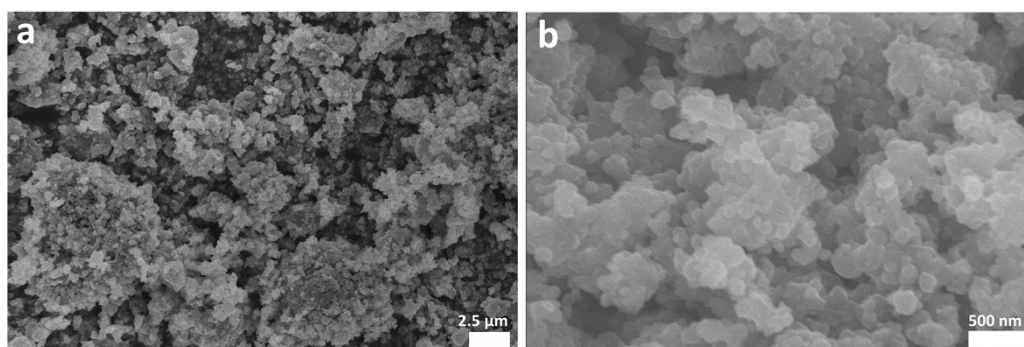

**Fig S2** SEM images of the prepared (a, b) CoS<sub>2</sub>/CoS powders.

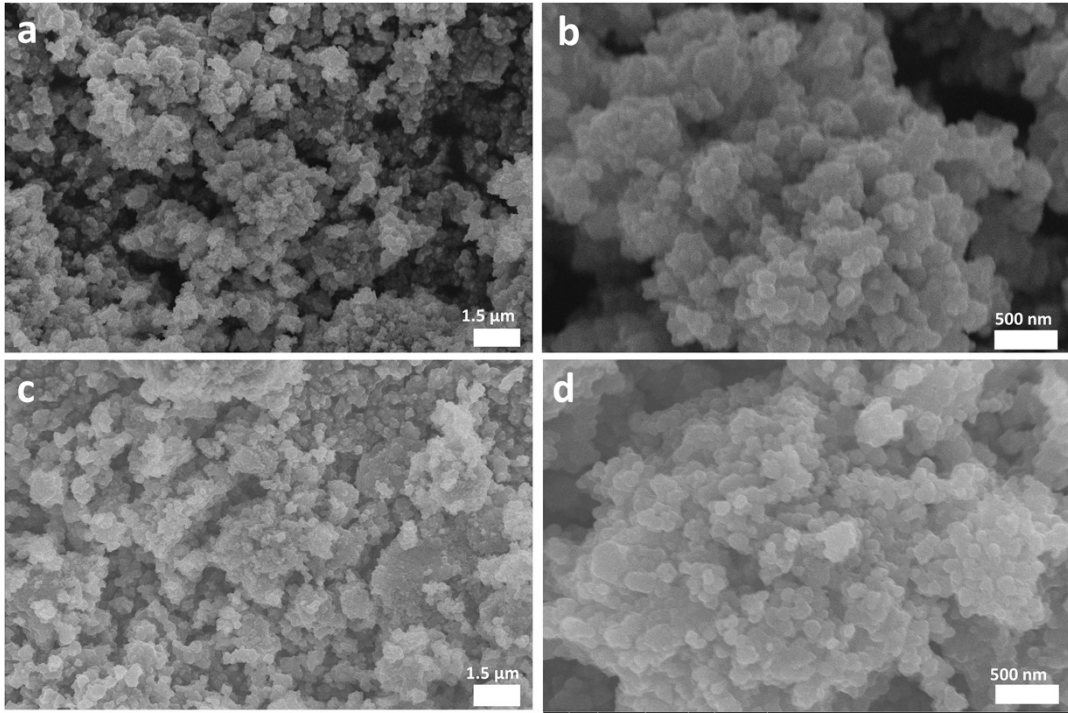

**Fig S3** SEM images of the prepared (a, b) CoS powders and (c, d) CoS<sub>2</sub> powders.

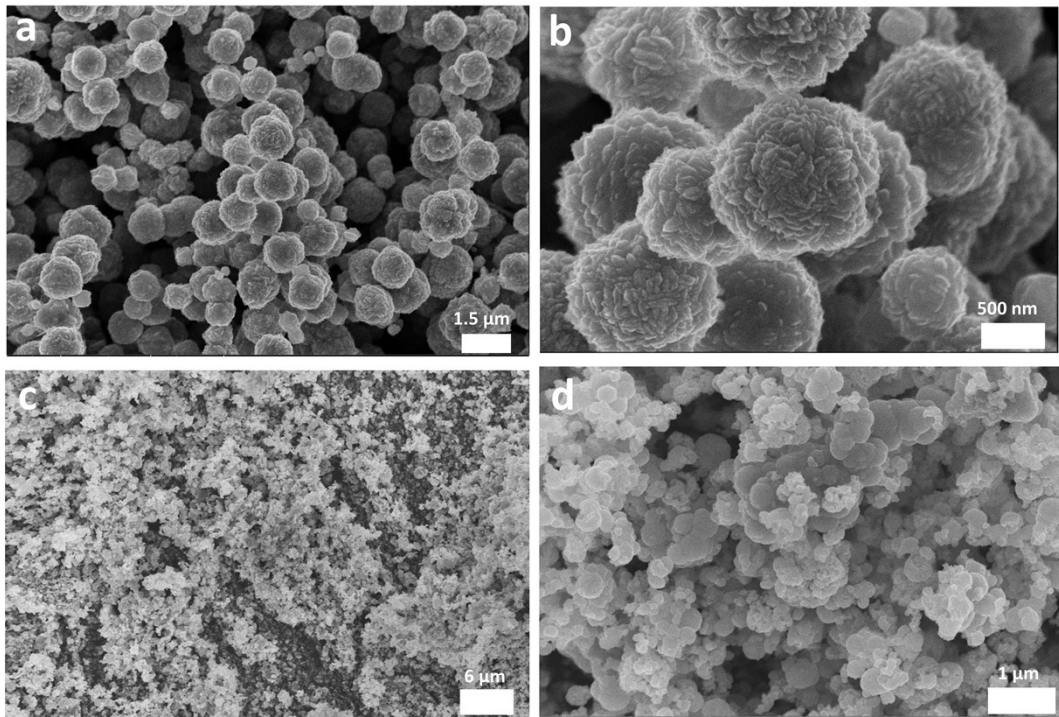

**Fig S4** SEM images of the prepared (a, b) FeS<sub>2</sub> and (c, d) NiS<sub>2</sub>.

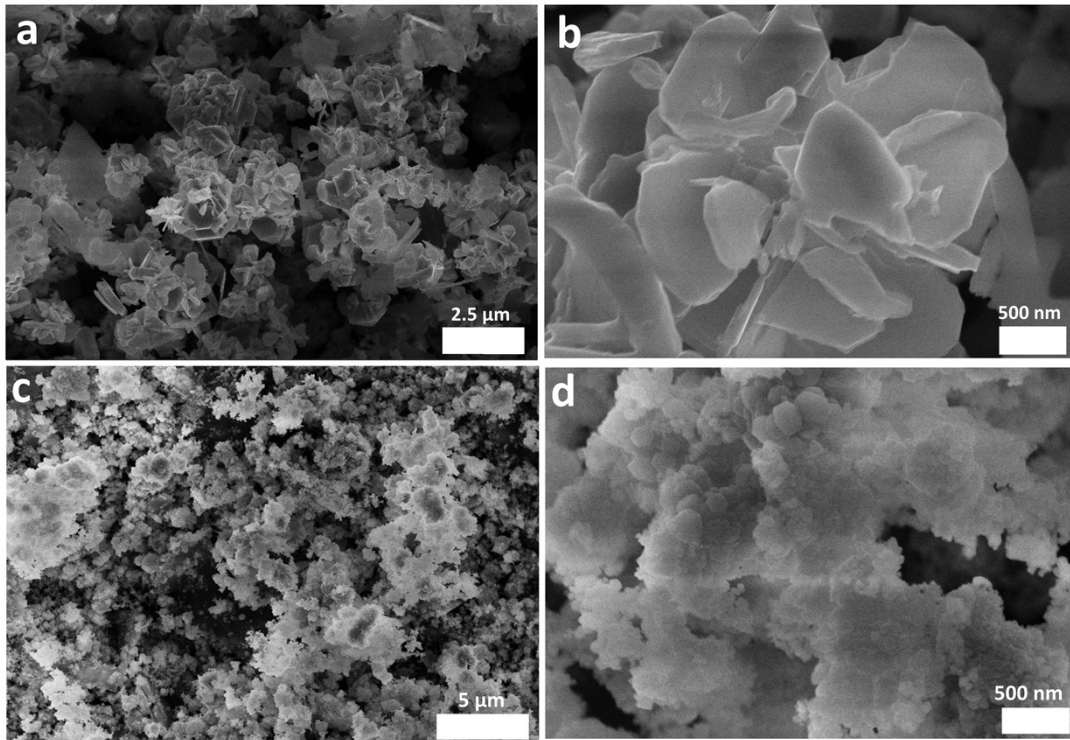

**Fig S5** SEM images of the prepared (a, b)  $\text{Cu}_7\text{S}_4$  and (c, d)  $\text{CdS}$ .

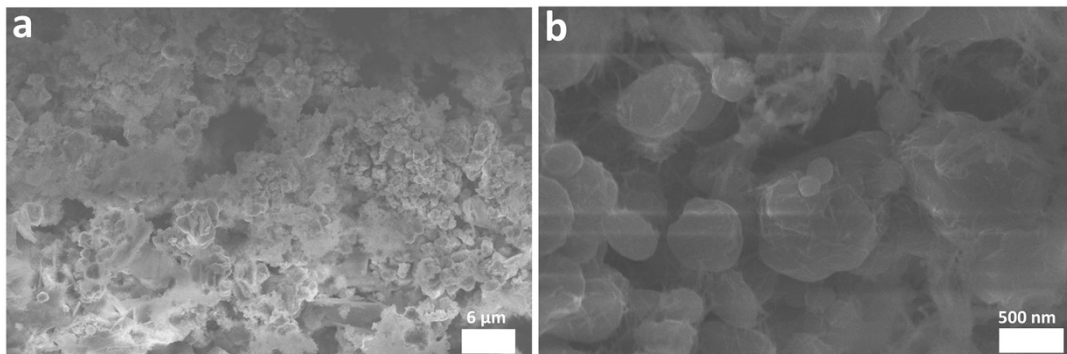

**Fig S6** SEM images of the prepared  $\text{MnS}$ .

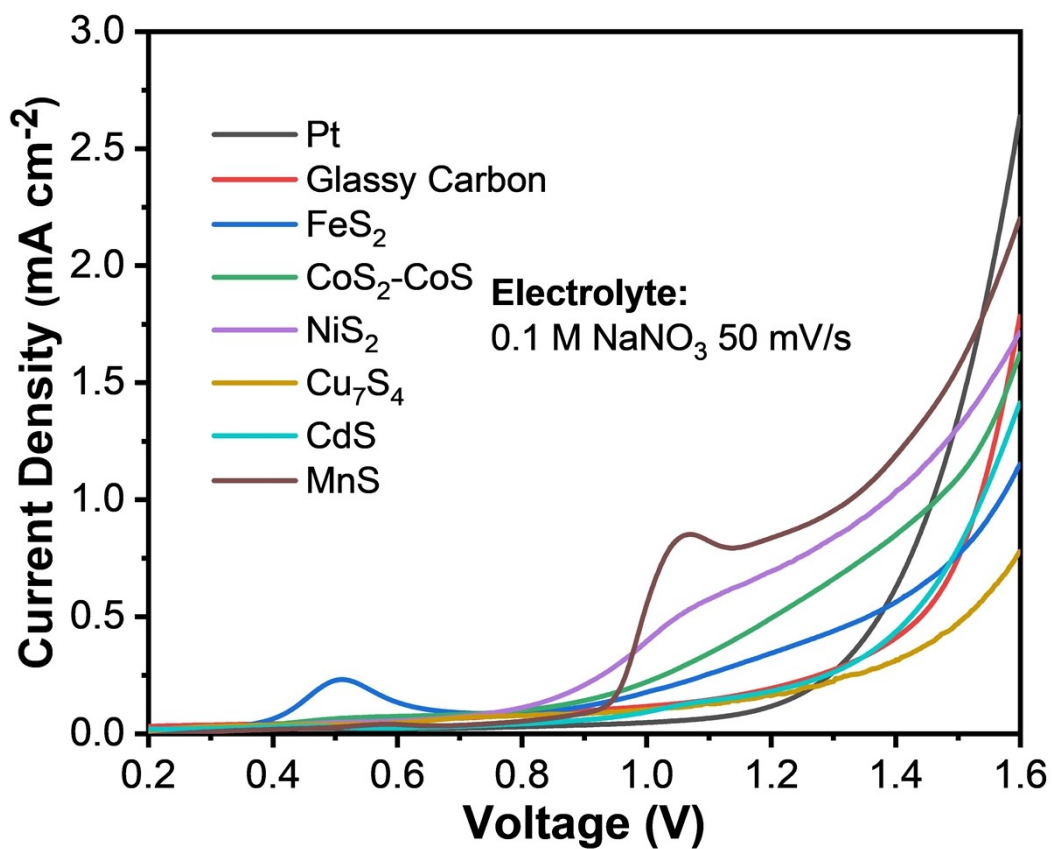

Fig S7 LSV curves of the different working electrodes in 0.1 M NaNO<sub>3</sub>. Scan rate: 50 mV/s.

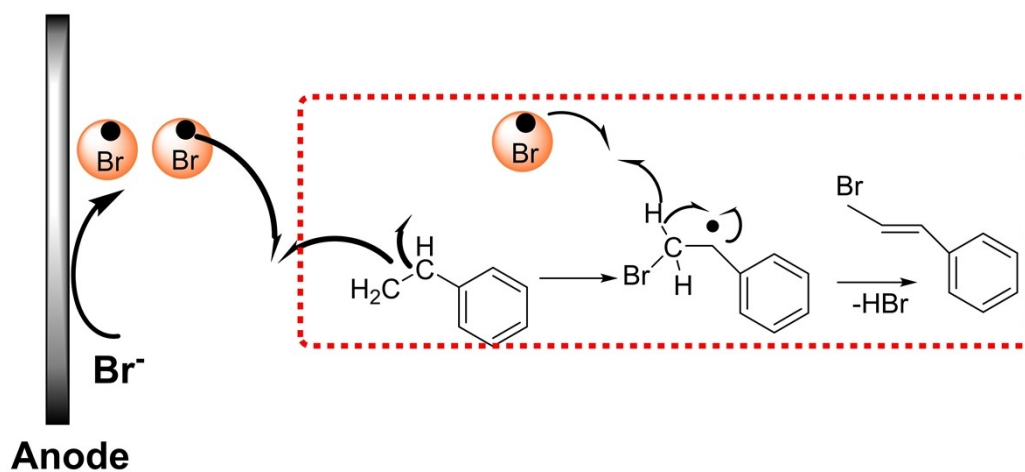

Fig S8 The mechanism of the  $\beta$ -bromostyrene formation.

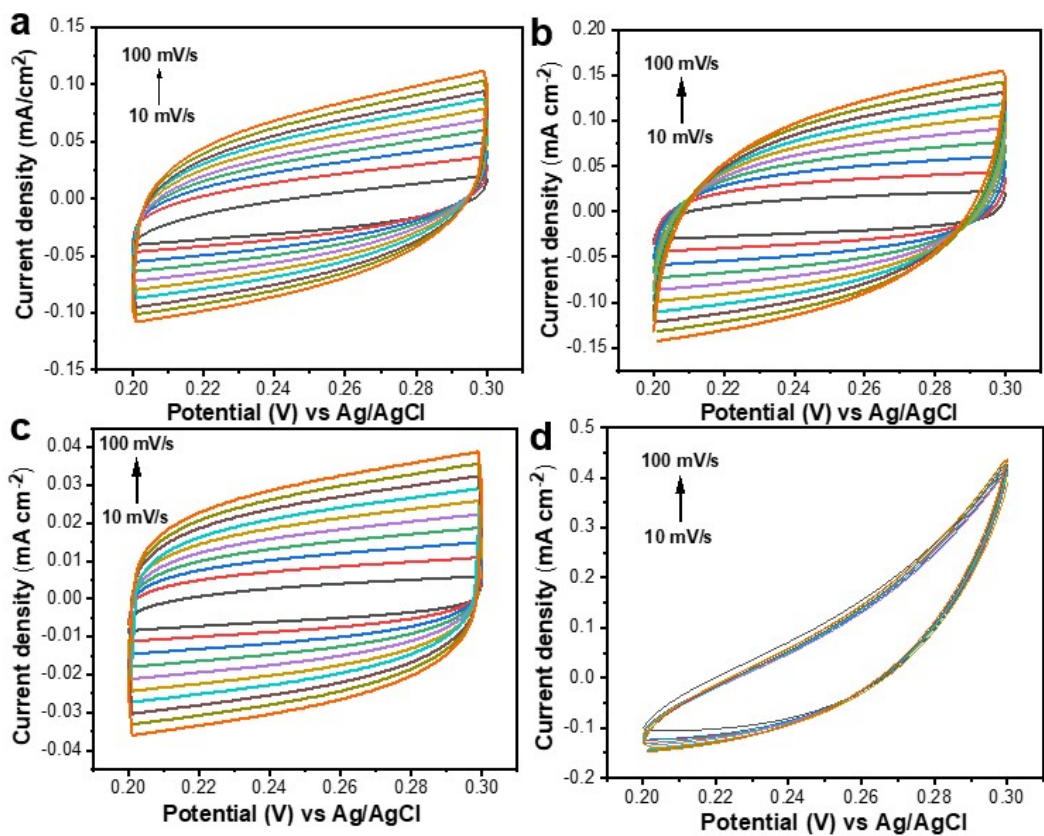

**Fig S9** The cyclic voltammety spectra for (a) FeS<sub>2</sub>, (b) CoS<sub>2</sub>, (c) NiS<sub>2</sub>, (d) Cu<sub>7</sub>S<sub>4</sub> in 0.5 M NaBr aqueous solution in the potential range of 0.2 - 0.3 V. Counter electrode: Platinum. Reference electrode: Ag/AgCl. Scan rate: 10 – 100 mV/s.



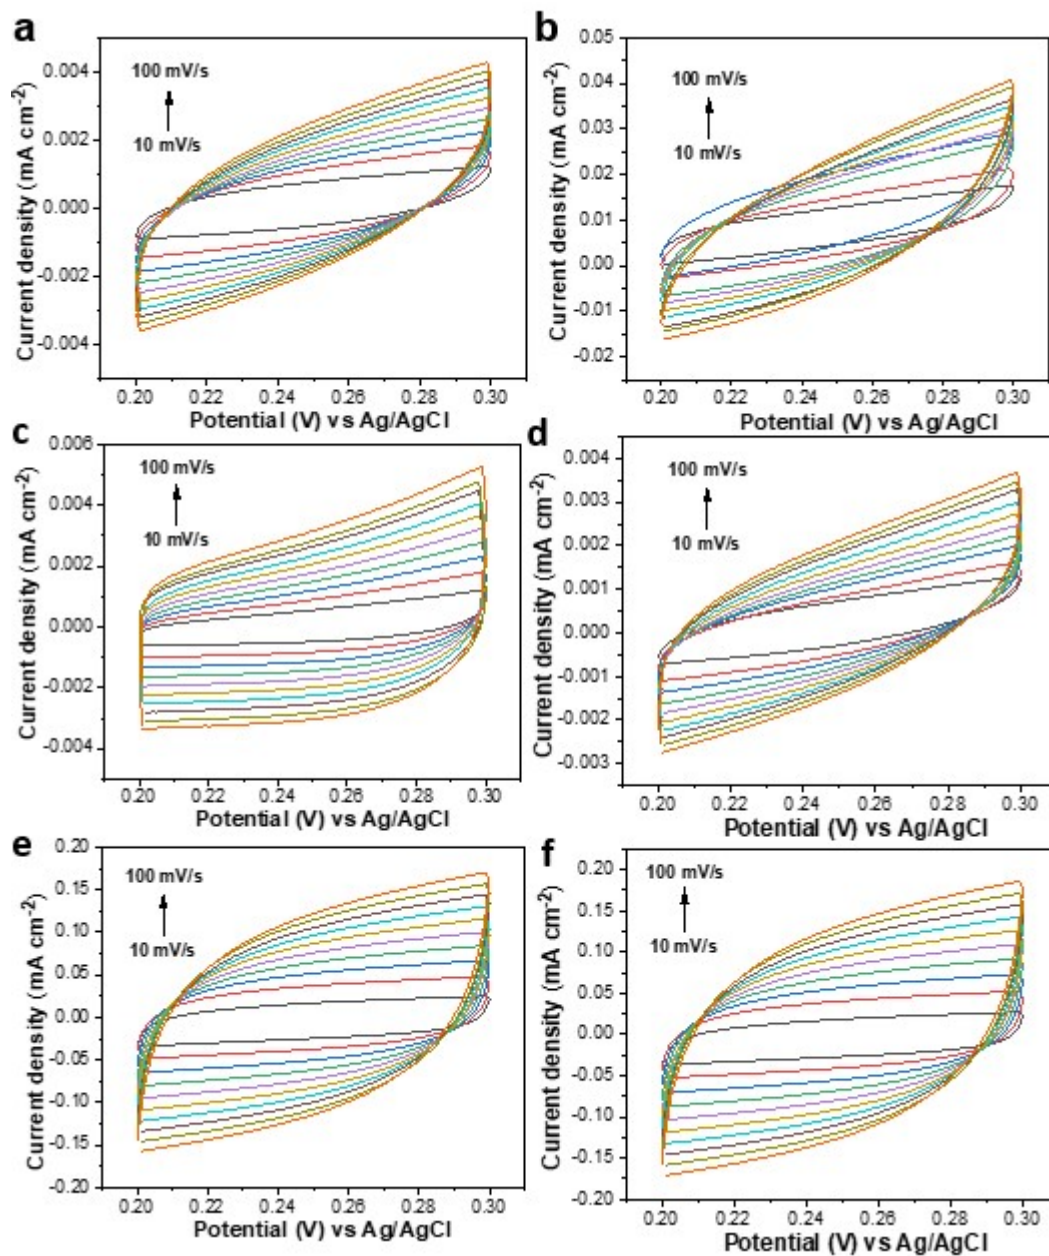

**Fig S10** The cyclic voltammety spectra for (a) CdS, (b) MnS, (c) Pt, (d) Glassy Carbon, (e) CoS, (f) CoS<sub>2</sub>/CoS in 0.5 M NaBr aqueous solution in the potential range of 0.2 - 0.3 V. Counter electrode: Platinum. Reference electrode: Ag/AgCl. Scan rate: 10 – 100 mV/s.

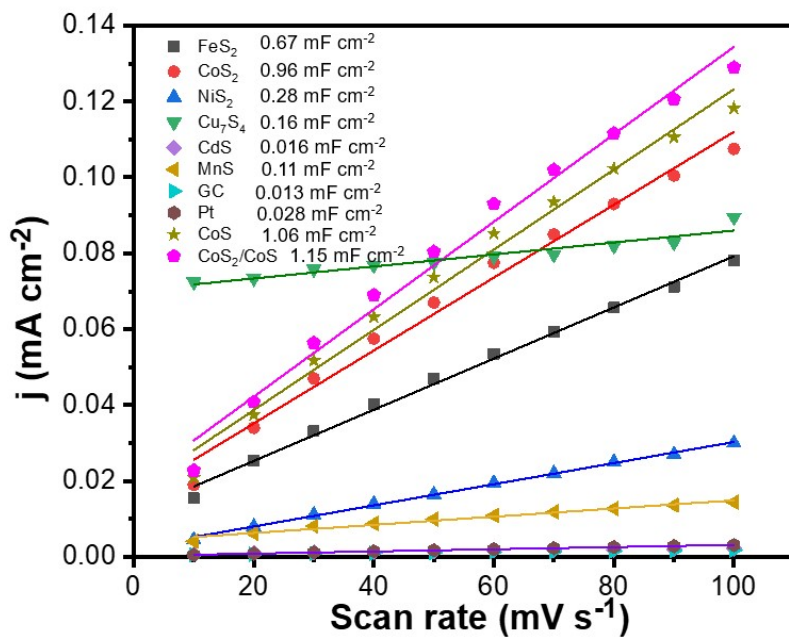

**Fig S11** Capacitive currents at 0.25 V (vs. Ag/AgCl) of FeS<sub>2</sub>, CoS<sub>2</sub>, NiS<sub>2</sub>, Cu<sub>7</sub>S<sub>4</sub>, CdS, MnS, GC, Pt, CoS, CoS<sub>2</sub>/CoS in 0.5 M NaBr buffer solution.

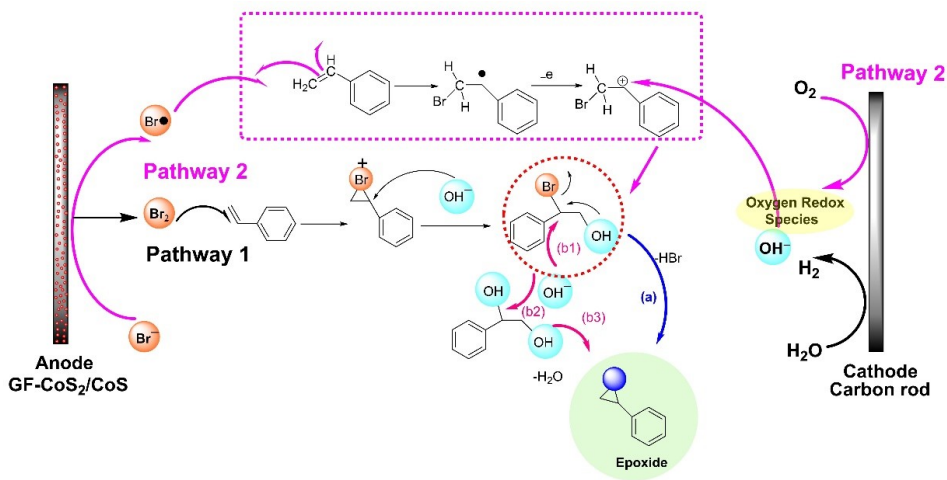

**Fig S12** Reaction mechanism involved in electro-epoxidation.

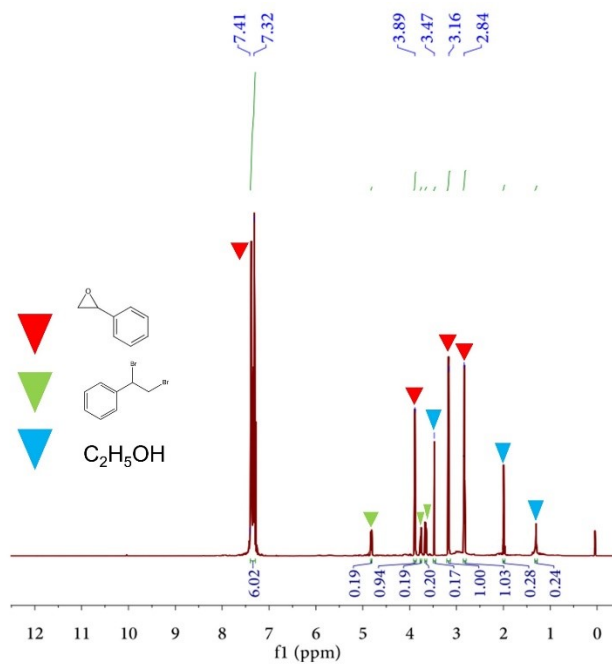

**Fig S13**  $^1\text{H-NMR}$  for the mixture products from the electro-epoxidation of styrene after 3 hours of the reaction.

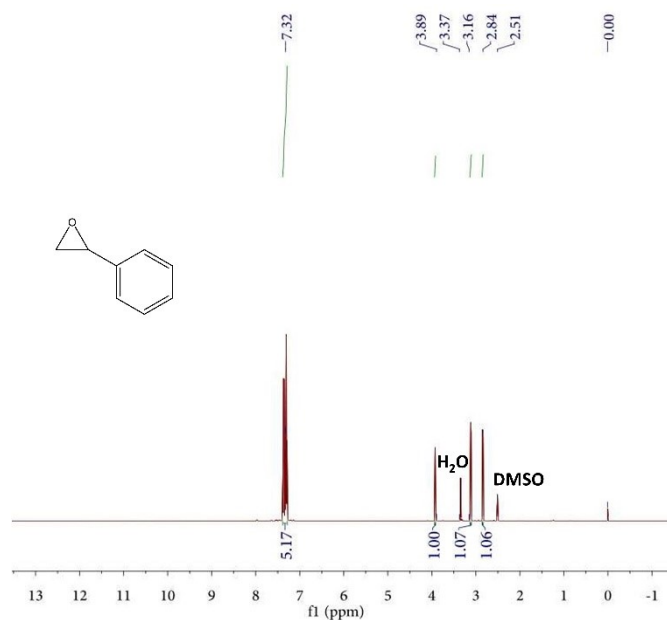

**Fig S14**  $^1\text{H-NMR}$  for the styrene oxide after column separation.

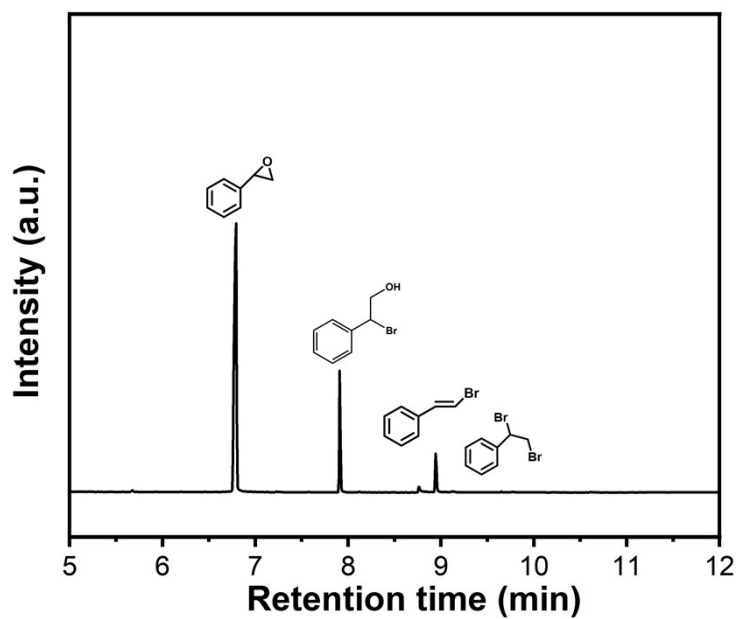

**Fig S15** GC-MS data for bromohydrin during the electrochemical epoxidation for 1 h.

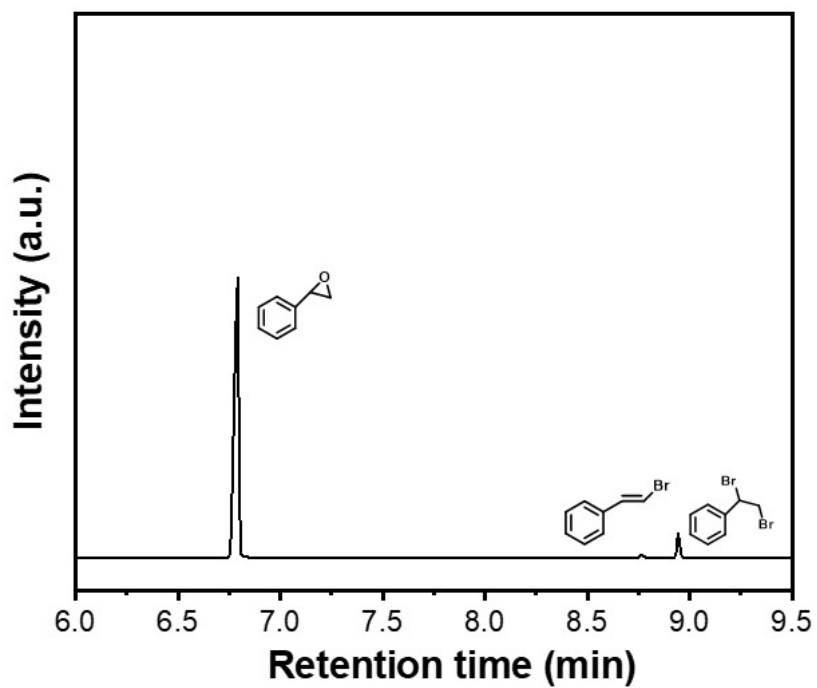

**Fig S16** GC-MS data for styrene after electrochemical epoxidation for 4 h.

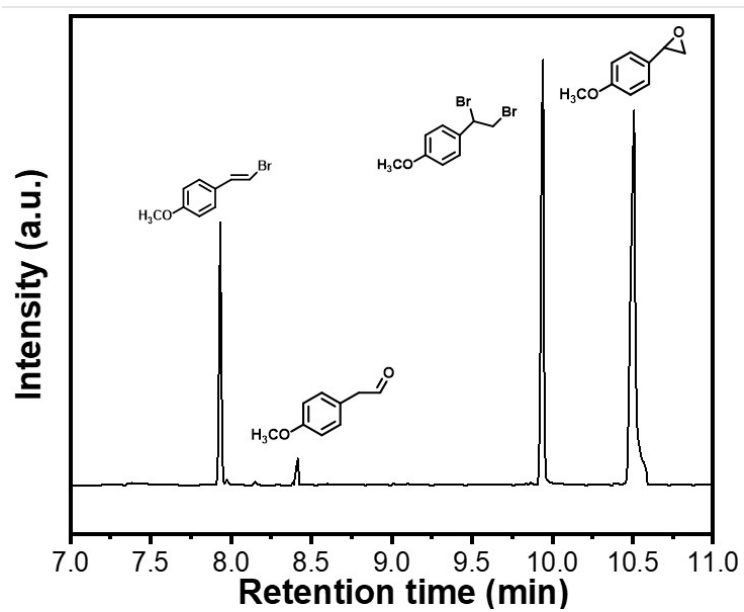

**Fig S17** GC-MS data for 4-Methoxystyrene after electrochemical epoxidation for 4 h.

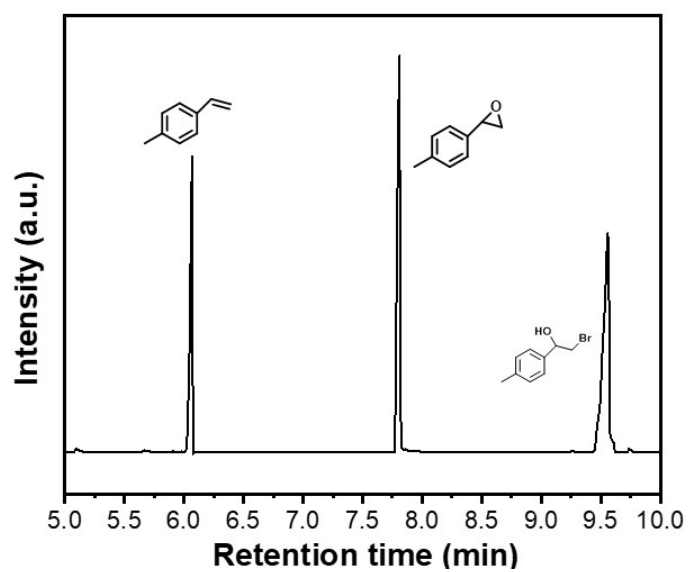

**Fig S18** GC-MS data for 4-methylphenylene after electrochemical epoxidation for 4 h.

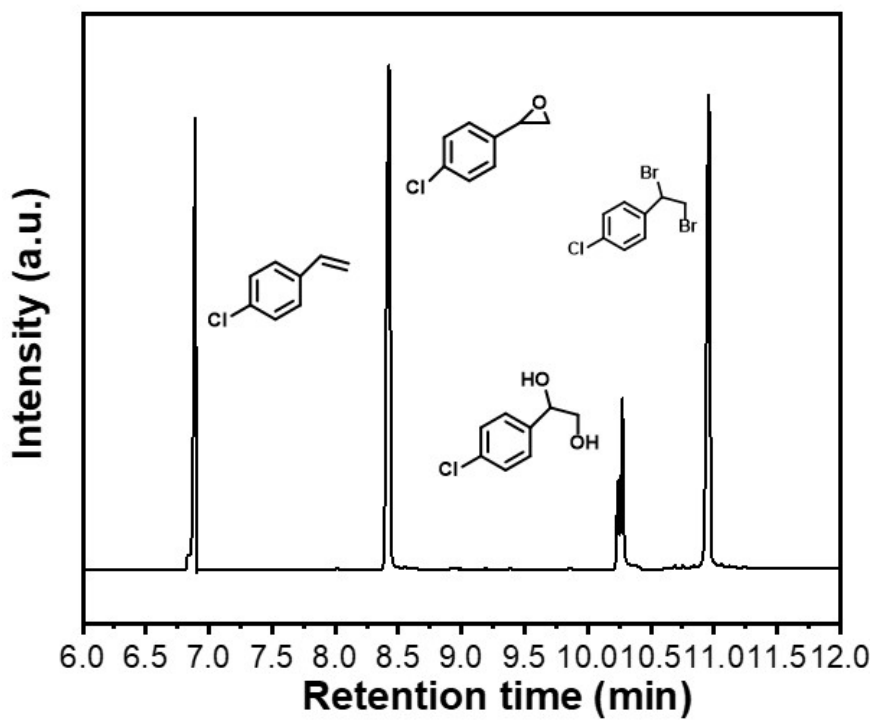

**Fig S19** GC-MS data for 4-chlorostyrene after electrochemical epoxidation for 4 h.

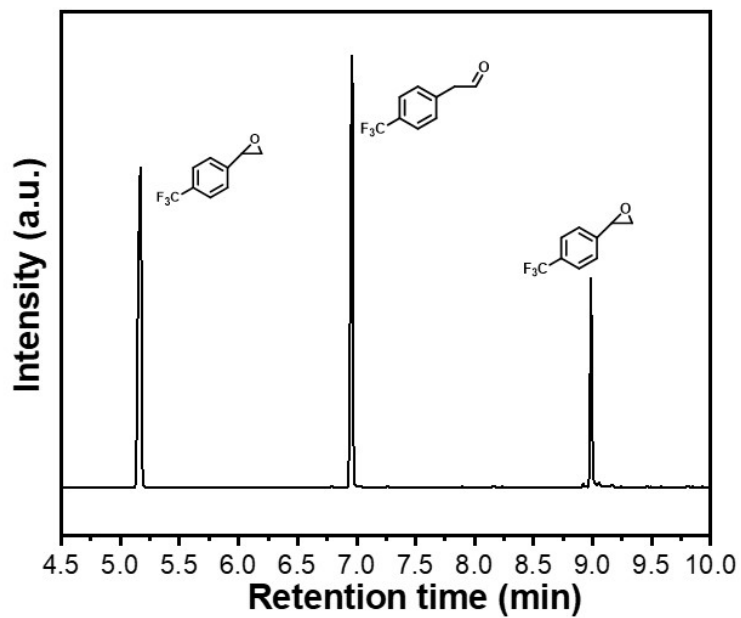

**Fig S20** GC-MS data for 4-(trifluoromethyl)-styrene after electrochemical epoxidation for 4 h.

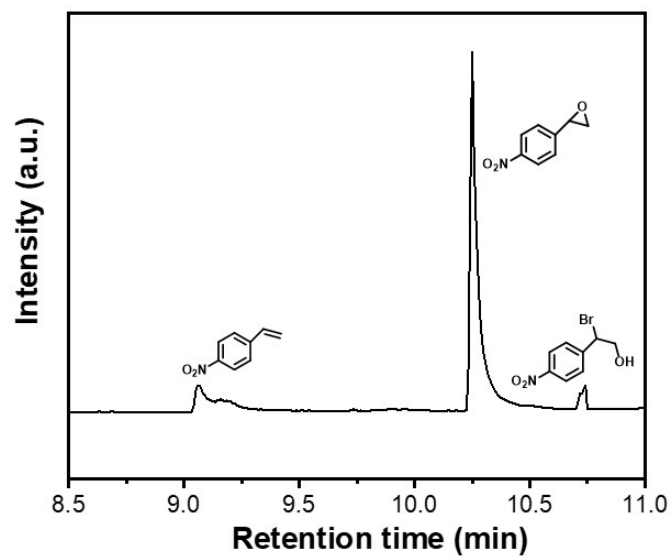

**Fig S21** GC-MS data for 4-nitrostyrene after electrochemical epoxidation for 4 h.

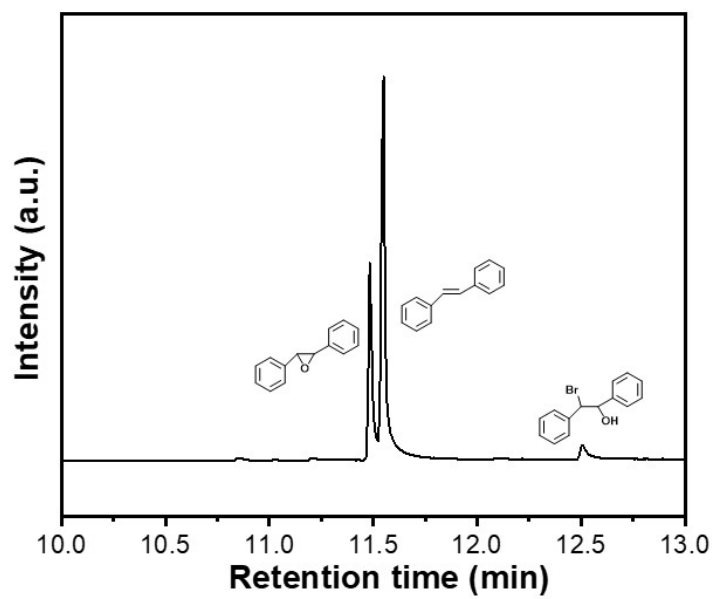

**Fig S22** GC-MS data for stilbene after electrochemical epoxidation for 4 h.

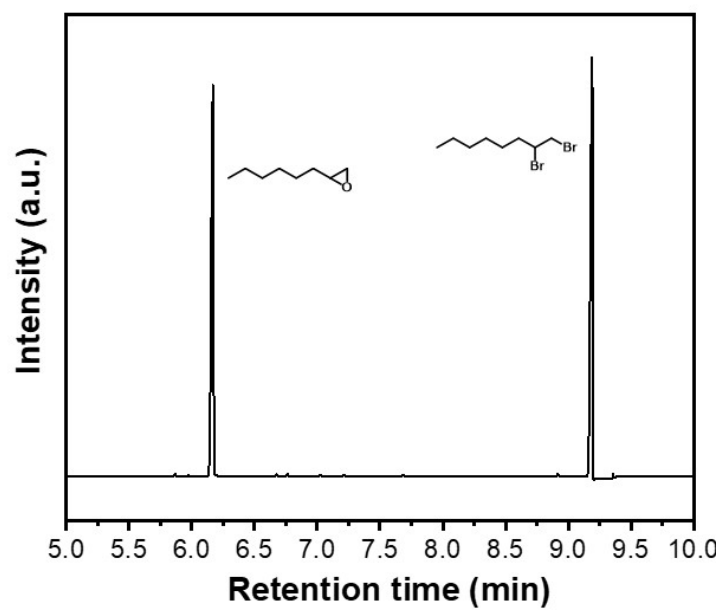

**Fig S23** GC-MS data for octene after electrochemical epoxidation for 4 h.

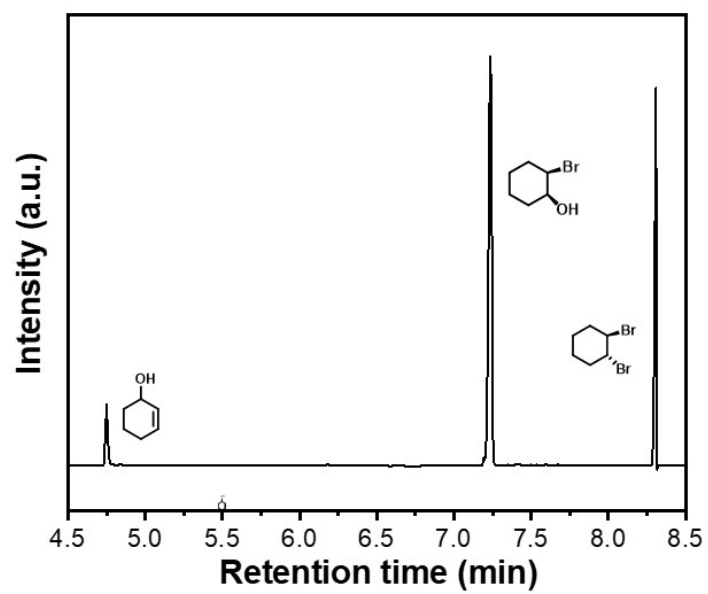

**Fig S24** GC-MS data for cyclohexene after electrochemical epoxidation for 4 h.
